# Supplementary material
Source: publisher figshare collection journal article supplement (https://karger.figshare.com/ndownloader/files/28562181)
Supplement: Supplementary file 1 [file 28562181]

| **Supplementary table 1. History that traces advancement in knowledge about TSD** | | |
| --- | --- | --- |
| **The Pioneers** | | |
| **Reference** | **Turtle** | **Contribution** |
| [Charnier, 1966] | Rainbow Lizard*, Agama agama* | Pioneer in the field.  Discovered that biased sex ratios relate to incubation temperature |
| [Pieau, 1971, 1972**]** | Greek tortoise*, Testudo graeca*  European pond, *Emys orbicularis* | Pioneer in the field.  Correlated the effect of steroids on temperature sex determination. |
| [Yntema, 1976] | Snapping turtle*, Chelydra serpentina* | Pioneer in the field.  Documented influence of incubation temperature on hatchling sex ratio. |
| **Studies about gonadal differentiation in TSD species** | | |
| [Yntema and Mrosovsky, 1982] | Loggerhead sea turtle*, Caretta caretta* | Determined that at 32 °C, all embryos formed ovaries and at 28°C, all embryos formed testes. Defined 30°C as the Pivotal Temperature (PT). |
| [Mrosovsky et al., 1985] | Leatherback sea turtle, *Dermochelys coriacea* | Demonstrated that eggs incubated below 29 °C resulted in phenotypic males.  The cortex is not as well-differentiated at hatching. |
| [Merchant-Larios et al., 1989; Merchant-Larios and Villalpando, 1990] | Olive ridley sea turtle, *Lepidochelys olivacea* | Documented migration of primordial germ cells, as well as gonadal morphogenesis at male-promoting temperature (MPT) and female-promoting temperature (FPT), *in vivo* and *in vitro*. |
| [Wibbels et al., 1991b, a] | Red-eared slider turtle,  *Trachemys scripta* | Described chronology of gonadal differentiation and synergy between temperature and estrogen levels. |
| **Analyzing the role of estradiol and aromatase in ovarian differentiation** | | |
| [Pieau, 1970, 1974] | *Testudo graeca*  *Emys orbicularis* | Demonstrated that aromatase participates in ovarian differentiation and that exogenous estrogens promote the feminization of gonads, at MPT.  Discovered that estradiol induces various degrees of gonad, resulting in ovotestis or ovary.  Showed that this is dependent on dose and embryonic stage at the time of administration. |
| [Gutzke and Bull, 1986; Gutzke and Chymiy, 1988] | Painted turtle, *Chrysemys picta.*  *Chelydra serpentina* |
| [Bull et al., 1988] | *Softshell, Trionyx spiniferus|* |
| [Crews et al., 1989] | *Chelydra serpentina* |
| [Merchant-Larios et al., 1997] | *Lepidochelys olivacea* | Demonstrated that estradiol treatments at MPT alter gonadal development, forming tiny ovaries |
| [Wibbels et al., 1993] | *Trachemys scripta* | Showed that 17β-estradiol and FPT induce medullar cord regression, prior to ovarian cortical thickening. |
| [Desvages and Pieau, 1991] | *Emys orbicularis* | Demonstrated activity on the part of steroidogenic enzymes: 3βHSD, 5α-reductase, and aromatase. |
| [Dorizzi et al., 1991; Desvages and Pieau, 1992; Desvages et al., 1993] | *Emys orbicularis* and the sea turtle *Dermochelys coreacea* | Documented gonadal aromatase activity and that fadrozole and letrozole induce various grades of gonadal masculinization. |
| [Dorizzi et al., 1994; Richard-Mercier et al., 1995; Dorizzi et al., 1996] | *Emys orbicularis* | Showed that antiestrogens or aromatase inhibitors promote testicular differentiation at FPT, and that after temperature-sensitive period (TSP), letrozole still induces different degrees of masculinization at FPT. The ovary retains male potential after TSP. |
| [Crews and Bergeron, 1994; Wibbels and Crews, 1994] | *Trachemys scripta* | Showed that fadrozol (aromatase inhibitor) induces male sex determination at FPT. |
| [Rhen and Lang, 1994] | *Chelydra serpentina* | Showed that fadrozole increases the percentage of males, at pivotal temperature. |
| [Barske and Capel, 2010] | *Trachemys scripta* | Showed that estrogen suppresses Sox9 and that aromatase inhibitors maintain Sox9 expression in medullary cords and form ovotestes. |
| [Matsumoto et al., 2013b] | *Trachemys scripta* | Showed that estradiol reverts the expression pattern of male candidate genes at MPT. Treatment with testosterone + aromatase inhibitor at FPT reverts the female pattern of candidate sex-determining genes. |
| [Bieser and Wibbels, 2014] | *Trachemys scripta* | Documented chronology of expression profiles of *Dmrt1*, *Sox9*, *Amh*, *Lhx9* and *Foxl2* in embryonic gonad treated with letrozole and estrogen. Treatment with estradiol reduce gonad size. |
| [Díaz-Hernández et al., 2015]  [Díaz-Hernández et al., 2017] | *Lepidochelys olivacea*  *Lepidochelys olivacea* | Documented that estradiol reduces cell proliferation of gonadal cells and produces hypoplastic ovaries and also induces precocious expression of *Foxl2* at MPT.  Treatments with fadrozole and fulvestrant showed that cell proliferation and male differentiation of the medullary cords is dependent on estradiol, whereas the cortex was unresponsive. |
| **Analyzing the role of androgens, the develop gonad** | | |
| [Wibbels et al., 1992; Wibbels and Crews, 1995] | *Trachemys scripta* | Showed that testosterone induces variable gonadal feminization, whereas non aromatizable DHT has no effect. |
| [Rhen and Lang, 1994; Rhen and Schroeder, 2010] | *Chelydra serpentina* | Showed that DHT has a feminizing effect at pivotal and feminizing temperatures, whereas the effect of flutamide is ambiguous, as both masculinizing and feminizing effects depend on temperature. |
| [Rhen et al., 2007] | *Chelydra serpentina* | Demonstrated that *androgen receptor* (Ar) expression increases with temperature change from MPT to FPT, during TSP. |
| [Schroeder and Rhen, 2019] | *Chelydra serpentina* | Demonstrated that DHT and flutamide induce ovary development  and that androgens and Ar participate in ovary determination |
| **The sex determination gene candidates** | | |
| [Jeyasuria et al., 1994] | Diamondblack terrapin, *Malaclemys terrapian* | Reported a partial cDNA sequence of *aromatase* |
| [Jeyasuria and Place, 1997] | *Malaclemys* terrapian | Showed that *aromatase* upregulation in the brain precedes gonadal sex differentiation. |
| [Bergeron et al., 1998] | *Trachemys scripta* | Demonstrated that *estrogen receptor* (*Er*) is expressed at FPT and MPT prior to gonadal differentiation. However, *Ar* is higher at FPT than MPT, at the beginning of TSP. |
| [Spotila et al., 1998] | *Trachemys scripta* | Identified partial sequence of *Wt1* and *Sox9*. *Sox9* is expressed in undifferentiated gonads and remains expressed in the testis. |
| [Moreno-Mendoza et al., 1999] | *Lepidochelys olivacea* | Revealed expression of Sox9 protein by immunofluorescence. Sox9 protein was detected in the nuclei of medullary cords of bipotential and male gonads. Sox9 was not detected in ovarian committed gonads. |
| [Kettlewell et al., 2000] | *Trachemys scripta* | Used RT-PCR to demonstrate expression of *Dmrt1* and *in situ* hybridization. Showed that *Dmrt1* is higher at MPT than FPT, during TSP. |
| [Torres-Maldonado et al., 2001] | *Lepidochelys olivacea* | Showed that *Sox9* is downregulated in gonads that switch from MPT to FPT. |
| [Moreno-Mendoza et al., 2001] | *Lepidochelys olivacea* | Demonstrated regulation of Sox9 protein in cultured gonads that change temperature during TSP. |
| [Torres Maldonado et al., 2002] | *Lepidochelys olivacea* | Showed that in early bipotential gonads, *Dmrt1* expression is higher than *Sox9* at MPT, than it is at FPT. |
| [Loffler et al., 2003] | *Trachemys scripta* | Showed that during TSP, expression of *Foxl2* is higher at FPT than it is at MPT. |
| [Rhen et al., 2007] | *Chelydra serpentina* | Identified expression of candidate sex-determining genes: *Dmrt1*, *Sox9*, *Ar*, *Foxl2*, *Dax1*, *Fgf9*, *aromatase* estrogen receptor (*Er*) and *Sf1.* |
| [Shoemaker et al., 2007a] | *Trachemys scripta* | Defined expression levels of *Dmrt1, MIS*, and *Sox*9, using qPCR and *in situ* hybridization. Demonstrated that *Dmrt1* expression is dimorphic before and after sex determination and that *Sox9* levels are similar at both temperatures in bipotential gonads. Also that expression of Dmrt1 is upregulated at MPT. |
| [Shoemaker et al., 2007b] | *Trachemys scripta* | Demonstrated that expression pattern of *Foxl2* is ovarian specific. Wnt4 is related to the formation of the ovary and testis. *Sox9* showed a pattern associated with testis formation. Amh was higher at MPT than at FPT, at all stages analyzed. |
| [Ramsey et al., 2007] | *Trachemys scripta* | Used q RT-PCR and *in situ* hybridization to identify *Sf1* and *aromatase* expression*.* They also showed that *Sf1* and *aromatase* were differentially expressed during sex determination. |
| [Smith et al., 2008] | *Trachemys scripta* | Showed that *Rspo1* is upregulated at FPT but remains low at MPT. At FPT it remains high throughout ovary differentiation. *Rspo1* expression is sensitive to temperature variation. |
| [Merchant-Larios et al., 2010] | *Lepidochelys olivacea* | Revealed expression of *Sox9* and *Amh* during TSP by *in situ* hybridization and immunofluorescence. |
| [Díaz-Hernández et al., 2012] | *Lepidochelys olivacea* | Demonstrated that the mesothelial cell domain of Sox9-expressing cells precedes the formation of the genital ridges. |
|  |  |  |
| [Valenzuela et al., 2013] | *Chrysemys picta* | This review defined expression patterns of *Wt1*, *Sf1*, *Sox9*, *aromatase,* and *Dax1*  during gonad development using trunks, adrenal-kidney-gonad complex, or gonad of painted turtles incubated at constant FPT and MPT. |
| [Sifuentes-Romero et al., 2013] | *Lepidochelys olivacea* | Using RNAi to silence *Sox9* in cultured gonads, they deduced that Sox9 regulates *Amh* expression. |
|  |  |  |
| [Schroeder et al., 2016] | *Chelydra serpentina* | Discovered that SNP in Cirbp protein loci is associated with gonadal sex determination and differentiation. |
| [Tang et al., 2017] | Chinese pond turtle (Mauremys reevesii) | Defined complete coding sequence and expression patterns of *Cyp19a1*, *Rspo1*, *Foxl2*, *Sf1* *Dmrt1*, and *Sox9*. Likewise showed that at C*yp19a1*, *Rspo 1* and *Foxl2* are expressed preferentially at FPT, during TSP.  Showed that *Dmrt1* is higher at MPT than FPT at the beginning of TSP and that *Sox9* manifests dimorphic expression until the end of TSP |
| [Guo and Rhen, 2017] | *Chelydra serpentina* | The authors cloned the proximal promoter and coding sequence of *Foxl2*, in frame with mCherry to produce a fluorescent reporter, in order to determine whether androgens regulate transcription of *Foxl2*.  DHT did not modify the expression of tFoxl2-mCherry. |
| [Ge et al., 2017] | *Trachemys scripta* | Authors identified loss- and gain-of-function and epigenetic studies to *Dmrt1*. They showed that *Dmrt1* manifests a dimorphic pattern, prior to sex differentiation. |
| [Diaz-Hernandez et al., 2019] | *Lepidochelys olivacea* | Used qTR-PCR and immunofluorescence to analyze the Spatiotemporal pattern of expression of Dmrt1 and Foxl2.  *Dmrt1* mRNA and protein showed a dimorphic pattern in early (stage 24), as opposed to *Foxl2* mRNA in late (stage 25) bipotential gonads. Sox9 showed dimorphic expression remaining in testes from stage 25 onwards. |
| [Mizoguchi and Valenzuela, 2020] | *Chrysemys picta* | Reported the first non-canonical Dmrt1 isoform, lacks exons 2 and 3. Dmrt1 canonical (contains all five exons). Isoforms showed dimorphic expression (male-biased) after the onset of sex determination |
| **Epigenetic mechanisms controlling TSD** | | |
| [Matsumoto et al., 2013a] | *Trachemys scripta* | Authors studied the methylation pattern of the *aromatase* gene.  The DNA methylation level of *Cyp19a1* promoter was higher at MPT than FPT and this pattern changed in response to temperature variation. They explained that aromatase is expressed strictly in relation to FPT. |
| [Matsumoto et al., 2016] | Red-eared slider turtle  *Trachemys scripta* | Authors described the changes in DNA methylation of *aromatase* that occur with temperature change and H3K4me3 histone changes. |
| [Venegas et al., 2016] | *Lepidochelys olivacea* | Authors described global DNA Methylation patterns in gonads at MPT and FPT. |
| [Ge et al., 2017] | Red-eared slider turtle  *Trachemys scripta* | Authors demonstrated that the DNA methylation level of *Dmrt1* manifested dimorphism from stage 25, as well as response to temperature changes. |
| [Radhakrishnan et al., 2017; Radhakrishnan et al., 2018] | *Chysemys picta*  *Chysemys picta* and *Apalone spinifera* (with genotypic sex determination) | Authors reported differences in genome-wide DNA methylation in the gonads, at FPT and MPT of 3-month-old hatchling.  Authors analyzed the embryonic gonadal expression of:  genome-wide epigenetic, genes, ncRNA, methylation, ubiquitination, phosphorylation, and small RNA |
| [Ge et al., 2018] | *Trachemys scripta* | Authors showed that the histone H3 Lysine 27 (H3K27) demethylase KDM6B was differentially expressed at FPT and MPT.  They also performed tests for gain and loss of function:  knockdown assay of Kdm6b at MPT induces female descendants. While overexpression of *Dmrt1* rescues the reversal phenotype.  *Kdm6b* responds to estrogens and aromatase inhibitor.  Kdm6b promotes the expression of *Dmrt1* at MPT to demethylate H3K27 in the promoter. |
| [Weber et al., 2020] | *Trachemys scripta* | Authors showed that higher calcium levels at 31°C (FPT) promote Stat3 phosphorylation, which represses *Kdm6b* transcription, a required activator for *Dmrt1* expression. |
| **TRANCRIPTOMES** |  |  |
| [Czerwinski et al., 2016] | *Trachemys scripta* | Authors undertook a transcriptome-wide analysis at MPT and FPT.  The steroidogenic enzymes and brain showed sexually dimorphic expression, prior to gonad formation. |
| [Radhakrishnan et al., 2017] | *Chysemys picta* and *Apalone spinifera*  (with genotypic sex determination) | Authors reported temperature-specific gonadal transcriptomes, corroborated by PCR. |

**References**

Barske LA, Capel B: Estrogen represses SOX9 during sex determination in the red-eared slider turtle Trachemys scripta. Developmental biology 341:305-314 (2010).

Bergeron JM, Gahr M, Horan K, Wibbels T, Crews D: Cloning and in situ hybridization analysis of estrogen receptor in the developing gonad of the red-eared slider turtle, a species with temperature-dependent sex determination. Development, growth & differentiation 40:243-254 (1998).

Bieser KL, Wibbels T: Chronology, magnitude and duration of expression of putative sex-determining/differentiation genes in a turtle with temperature-dependent sex determination. Sexual development : genetics, molecular biology, evolution, endocrinology, embryology, and pathology of sex determination and differentiation 8:364-375 (2014).

Bull JJ, Gutzke WH, Crews D: Sex reversal by estradiol in three reptilian orders. General and comparative endocrinology 70:425-428 (1988).

Crews D, Bergeron JM: Role of reductase and aromatase in sex determination in the red-eared slider (Trachemys scripta), a turtle with temperature-dependent sex determination. The Journal of endocrinology 143:279-289 (1994).

Crews D, Wibbels T, Gutzke WH: Action of sex steroid hormones on temperature-induced sex determination in the snapping turtle (Chelydra serpentina). General and comparative endocrinology 76:159-166 (1989).

Czerwinski M, Natarajan A, Barske L, Looger LL, Capel B: A timecourse analysis of systemic and gonadal effects of temperature on sexual development of the red-eared slider turtle Trachemys scripta elegans. Developmental biology 420:166-177 (2016).

Charnier M: [Action of temperature on the sex ratio in the Agama agama (Agamidae, Lacertilia) embryo]. Comptes rendus des seances de la Societe de biologie et de ses filiales 160:620-622 (1966).

Desvages G, Girondot M, Pieau C: Sensitive stages for the effects of temperature on gonadal aromatase activity in embryos of the marine turtle Dermochelys coriacea. General and comparative endocrinology 92:54-61 (1993).

Desvages G, Pieau C: Steroid metabolism in gonads of turtle embryos as a function of the incubation temperature of eggs. The Journal of steroid biochemistry and molecular biology 39:203-213 (1991).

Desvages G, Pieau C: Aromatase activity in gonads of turtle embryos as a function of the incubation temperature of eggs. The Journal of steroid biochemistry and molecular biology 41:851-853 (1992).

Diaz-Hernandez V, Dominguez-Mora P, Chino-Palomo L, Marmolejo-Valencia A, Harfush M, Merchant-Larios H: Spatiotemporal Expression of Foxl2 and Dmrt1 before, during, and after Sex Determination in the Sea Turtle Lepidochelys olivacea. Sexual development : genetics, molecular biology, evolution, endocrinology, embryology, and pathology of sex determination and differentiation 13:286-296 (2019).

Díaz-Hernández V, Marmolejo-Valencia A, Harfush M, Merchant-Larios H: Formation of the genital ridges is preceded by a domain of ectopic Sox9-expressing cells in Lepidochelys olivacea. Developmental biology 361:156-166 (2012).

Díaz-Hernández V, Marmolejo-Valencia A, Merchant-Larios H: Exogenous estradiol alters gonadal growth and timing of temperature sex determination in gonads of sea turtle. Developmental biology 408:79-89 (2015).

Díaz-Hernández V, Vázquez-Gómez A, Marmolejo-Valencia A, Montaño LM, Merchant-Larios H: 17β-Estradiol modulates cell proliferation of medullary cords during ovarian differentiation of the Lepidochelys olivacea sea turtle. Developmental biology 431:263-271 (2017).

Dorizzi M, Mignot T-M, Guichard A, Desvages G, Pieau C: Involvement of oestrogens in sexual differentiation of gonads as a function of temperature in turtles. Differentiation; research in biological diversity 47:9-17 (1991).

Dorizzi M, Richard-Mercier N, Desvages G, Girondot M, Pieau C: Masculinization of gonads by aromatase inhibitors in a turtle with temperature-dependent sex determination. Differentiation; research in biological diversity 58:1-8 (1994).

Dorizzi M, Richard-Mercier N, Pieau C: The ovary retains male potential after the thermosensitive period for sex determination in the turtle Emys orbicularis. Differentiation; research in biological diversity 60:193-201 (1996).

Ge C, Ye J, Weber C, Sun W, Zhang H, Zhou Y, Cai C, Qian G, Capel B: The histone demethylase KDM6B regulates temperature-dependent sex determination in a turtle species. Science (New York, NY) 360:645-648 (2018).

Ge C, Ye J, Zhang H, Zhang Y, Sun W, Sang Y, Capel B, Qian G: Dmrt1 induces the male pathway in a turtle species with temperature-dependent sex determination. Development (Cambridge, England) 144:2222-2233 (2017).

Guo L, Rhen T: Characterization of the FoxL2 proximal promoter and coding sequence from the common snapping turtle (Chelydra serpentina). Comparative biochemistry and physiology Part A, Molecular & integrative physiology 212:45-55 (2017).

Gutzke WH, Bull JJ: Steroid hormones reverse sex in turtles. General and comparative endocrinology 64:368-372 (1986).

Gutzke WH, Chymiy DB: Sensitive periods during embryogeny for hormonally induced sex determination in turtles. General and comparative endocrinology 71:265-267 (1988).

Jeyasuria P, Place AR: Temperature-dependent aromatase expression in developing diamondback terrapin (Malaclemys terrapin) embryos. The Journal of steroid biochemistry and molecular biology 61:415-425 (1997).

Jeyasuria P, Roosenburg WM, Place AR: Role of P-450 aromatase in sex determination of the diamondback terrapin, Malaclemys terrapin. The Journal of experimental zoology 270:95-111 (1994).

Kettlewell JR, Raymond CS, Zarkower D: Temperature-dependent expression of turtle Dmrt1 prior to sexual differentiation. Genesis (New York, NY : 2000) 26:174-178 (2000).

Loffler KA, Zarkower D, Koopman P: Etiology of ovarian failure in blepharophimosis ptosis epicanthus inversus syndrome: FOXL2 is a conserved, early-acting gene in vertebrate ovarian development. Endocrinology 144:3237-3243 (2003).

Matsumoto Y, Buemio A, Chu R, Vafaee M, Crews D: Epigenetic control of gonadal aromatase (cyp19a1) in temperature-dependent sex determination of red-eared slider turtles. PloS one 8:e63599 (2013a).

Matsumoto Y, Hannigan B, Crews D: Temperature Shift Alters DNA Methylation and Histone Modification Patterns in Gonadal Aromatase (cyp19a1) Gene in Species with Temperature-Dependent Sex Determination. PloS one 11:e0167362 (2016).

Matsumoto Y, Yatsu R, Taylor C, Crews D: Changes in gonadal gene network by exogenous ligands in temperature-dependent sex determination. Journal of molecular endocrinology 50:389-400 (2013b).

Merchant-Larios H, Díaz-Hernández V, Marmolejo-Valencia A: Gonadal morphogenesis and gene expression in reptiles with temperature-dependent sex determination. Sexual development : genetics, molecular biology, evolution, endocrinology, embryology, and pathology of sex determination and differentiation 4:50-61 (2010).

Merchant-Larios H, Fierro IV, Urruiza BC: Gonadal Morphogenesis under Controlled Temperature in the Sea Turtle Lepidochelys olivacea. Herpetological Monographs 3:43-61 (1989).

Merchant-Larios H, Ruiz-Ramirez S, Moreno-Mendoza N, Marmolejo-Valencia A: Correlation among thermosensitive period, estradiol response, and gonad differentiation in the sea turtle Lepidochelys olivacea. General and comparative endocrinology 107:373-385 (1997).

Merchant-Larios H, Villalpando I: Effect of temperature on gonadal sex differentiation in the sea turtle Lepidochelys olivacea: An organ culture study. Journal of Experimental Zoology 254:327-331 (1990).

Mizoguchi B, Valenzuela N: Alternative splicing and thermosensitive expression of Dmrt1 during urogenital development in the painted turtle, Chrysemys picta. PeerJ 8:e8639 (2020).

Moreno-Mendoza N, Harley VR, Merchant-Larios H: Differential expression of SOX9 in gonads of the sea turtle Lepidochelys olivacea at male- or female-promoting temperatures. The Journal of experimental zoology 284:705-710 (1999).

Moreno-Mendoza N, Harley VR, Merchant-Larios H: Temperature regulates SOX9 expression in cultured gonads of Lepidochelys olivacea, a species with temperature sex determination. Developmental biology 229:319-326 (2001).

Mrosovsky N, Fretey J, Lescure J, Pieau C, Rimblot F: Sexual differentiation as a function of the incubation temperature of eggs in the sea-turtle Dermochelys coriacea (Vandelli, 1761). Amphibia-Reptilia 6:83-92 (1985).

Pieau C: [Effects of estradiol on the genital apparatus of the embryo of the Mauresque turtle (Testudo graceca L.)]. Archives d'anatomie microscopique et de morphologie experimentale 59:295-318 (1970).

Pieau C: [Sex ratio in the embryos of 2 chelonians (Testudo graeca L. and Emys orbicularis L.) born of artificially incubated ova]. Comptes rendus hebdomadaires des seances de l'Academie des sciences Serie D: Sciences naturelles 272:3071-3074 (1971).

Pieau C: [Temperature effects on the development of genital glands in the embryos of 2 chelonians, Emys orbicularis L. and Testudo graeca L]. Comptes rendus hebdomadaires des seances de l'Academie des sciences Serie D: Sciences naturelles 274:719-722 (1972).

Pieau C: Différenciation du sexe en fonction de la température chez les embryons d’Emys orbicularis L. (Chélonien); effets des hormones sexuelles. Annales d’Embryologie et de Morphogenèse 7:365–394 (1974).

Radhakrishnan S, Literman R, Neuwald J, Severin A, Valenzuela N: Transcriptomic responses to environmental temperature by turtles with temperature-dependent and genotypic sex determination assessed by RNAseq inform the genetic architecture of embryonic gonadal development. PloS one 12:e0172044 (2017).

Radhakrishnan S, Literman R, Neuwald JL, Valenzuela N: Thermal Response of Epigenetic Genes Informs Turtle Sex Determination with and without Sex Chromosomes. Sexual development : genetics, molecular biology, evolution, endocrinology, embryology, and pathology of sex determination and differentiation (2018).

Ramsey M, Shoemaker C, Crews D: Gonadal expression of Sf1 and aromatase during sex determination in the red-eared slider turtle (Trachemys scripta), a reptile with temperature-dependent sex determination. Differentiation; research in biological diversity 75:978-991 (2007).

Rhen T, Lang JW: Temperature-dependent sex determination in the snapping turtle: manipulation of the embryonic sex steroid environment. General and comparative endocrinology 96:243-254 (1994).

Rhen T, Metzger K, Schroeder A, Woodward R: Expression of putative sex-determining genes during the thermosensitive period of gonad development in the snapping turtle, Chelydra serpentina. Sexual development : genetics, molecular biology, evolution, endocrinology, embryology, and pathology of sex determination and differentiation 1:255-270 (2007).

Rhen T, Schroeder A: Molecular mechanisms of sex determination in reptiles. Sexual development : genetics, molecular biology, evolution, endocrinology, embryology, and pathology of sex determination and differentiation 4:16-28 (2010).

Richard-Mercier N, Dorizzi M, Desvages G, Girondot M, Pieau C: Endocrine sex reversal of gonads by the aromatase inhibitor Letrozole (CGS 20267) in Emys orbicularis, a turtle with temperature-dependent sex determination. General and comparative endocrinology 100:314-326 (1995).

Schroeder A, Rhen T: Role for androgens in determination of ovarian fate in the common snapping turtle, Chelydra serpentina. General and comparative endocrinology 281:7-16 (2019).

Schroeder AL, Metzger KJ, Miller A, Rhen T: A Novel Candidate Gene for Temperature-Dependent Sex Determination in the Common Snapping Turtle. Genetics 203:557-571 (2016).

Shoemaker C, Ramsey M, Queen J, Crews D: Expression of Sox9, Mis, and Dmrt1 in the gonad of a species with temperature-dependent sex determination. Developmental dynamics : an official publication of the American Association of Anatomists 236:1055-1063 (2007a).

Shoemaker CM, Queen J, Crews D: Response of candidate sex-determining genes to changes in temperature reveals their involvement in the molecular network underlying temperature-dependent sex determination. Molecular endocrinology (Baltimore, Md) 21:2750-2763 (2007b).

Sifuentes-Romero I, Merchant-Larios H, Milton SL, Moreno-Mendoza N, Díaz-Hernández V, García-Gasca A: RNAi-Mediated Gene Silencing in a Gonad Organ Culture to Study Sex Determination Mechanisms in Sea Turtle. Genes 4:293-305 (2013).

Smith CA, Shoemaker CM, Roeszler KN, Queen J, Crews D, Sinclair AH: Cloning and expression of R-Spondin1 in different vertebrates suggests a conserved role in ovarian development. BMC developmental biology 8:72 (2008).

Spotila LD, Spotila JR, Hall SE: Sequence and expression analysis of WT1 and Sox9 in the red-eared slider turtle, Trachemys scripta. The Journal of experimental zoology 281:417-427 (1998).

Tang WQ, Mu Y, Valenzuela N, Du WG: Effects of Incubation Temperature on the Expression of Sex-Related Genes in the Chinese Pond Turtle, Mauremys reevesii. Sexual development : genetics, molecular biology, evolution, endocrinology, embryology, and pathology of sex determination and differentiation 11:307-319 (2017).

Torres-Maldonado L, Moreno-Mendoza N, Landa A, Merchant-Larios H: Timing of SOX9 downregulation and female sex determination in gonads of the sea turtle Lepidochelys olivacea. The Journal of experimental zoology 290:498-503 (2001).

Torres Maldonado LC, Landa Piedra A, Moreno Mendoza N, Marmolejo Valencia A, Meza Martínez A, Merchant Larios H: Expression profiles of Dax1, Dmrt1, and Sox9 during temperature sex determination in gonads of the sea turtle Lepidochelys olivacea. General and comparative endocrinology 129:20-26 (2002).

Valenzuela N, Neuwald JL, Literman R: Transcriptional evolution underlying vertebrate sexual development. Developmental dynamics 242:307-319 (2013).

Venegas D, Marmolejo-Valencia A, Valdes-Quezada C, Govenzensky T, Recillas-Targa F, Merchant-Larios H: Dimorphic DNA methylation during temperature-dependent sex determination in the sea turtle Lepidochelys olivacea. General and comparative endocrinology 236:35-41 (2016).

Weber C, Zhou Y, Lee JG, Looger LL, Qian G, Ge C, Capel B: Temperature-dependent sex determination is mediated by pSTAT3 repression of Kdm6b. Science (New York, NY) 368:303-306 (2020).

Wibbels T, Bull JJ, Crews D: Chronology and morphology of temperature-dependent sex determination. The Journal of experimental zoology 260:371-381 (1991a).

Wibbels T, Bull JJ, Crews D: Synergism between temperature and estradiol: a common pathway in turtle sex determination? The Journal of experimental zoology 260:130-134 (1991b).

Wibbels T, Bull JJ, Crews D: Steroid hormone-induced male sex determination in an amniotic vertebrate. The Journal of experimental zoology 262:454-457 (1992).

Wibbels T, Crews D: Putative aromatase inhibitor induces male sex determination in a female unisexual lizard and in a turtle with temperature-dependent sex determination. The Journal of endocrinology 141:295-299 (1994).

Wibbels T, Crews D: Steroid-induced sex determination at incubation temperatures producing mixed sex ratios in a turtle with TSD. General and comparative endocrinology 100:53-60 (1995).

Wibbels T, Gideon P, Bull JJ, Crews D: Estrogen- and temperature-induced medullary cord regression during gonadal differentiation in a turtle. Differentiation; research in biological diversity 53:149-154 (1993).

Yntema CL: Effects of incubation temperatures on sexual differentiation in the turtle, Chelydra serpentina. Journal of morphology 150:453-461 (1976).

Yntema CL, Mrosovsky N: Critical periods and pivotal temperatures for sexual differentiation in loggerhead sea turtles. Canadian Journal of Zoology 60:1012-1016 (1982).
